# Supplementary material for: A parity code interpretation of nucleotide alphabet composition
Source: Royal Society of Chemistry journal article supplement (doi:10.1039/b205631c), 2002-01-01
Supplement: b205631c.doc [file b205631c.doc]

**I - Information Theory and Molecular Biology**

The importance of information theory in molecular biology is widely recognised; see for example Gatlin (1972) and Yockey (1992). However information theory is usually applied to the description of information content, symbol probabilities and so forth, where nucleotides and amino-acid residues are regarded as abstract symbols, and not to the detailed chemical features of nucleotides.

The potential role of error-coding was implicitly recognised by Yockey (p. 102) in his consideration of nucleotide transmission. Yockey assigned 5-bit numerical representations to A, C, G and U, but these assignments were arbitrary, and do not reflect nucleotide features; they derive from equating each nucleotide with a member of a 4-letter code, employed in an example of decoding, in the error-coding text of Peterson and Weldon (1972, p. 7).

The most significant work concerned with nucleotide recognition features is that of Szathmáry (1992). Szathmáry’s model recognised the role of hydrogen donor/acceptor patterns, and even introduced the concept of distance, but unfortunately did not proceed to develop the concept of parity, or address the issue in error-coding terms.

Peterson, W. W. and Weldon, E. J., Error-Correcting Codes, M.I.T. Press, Cambridge, MA, 1972.

Szathmáry, E., *Proc. Natl. Acad. Sci. USA,* 1992, **89**, 2614.

Yockey, H. P., Information Theory and Molecular Biology, Cambridge University Press, Cambridge, New York 1992.

**II - Calculations on Nucleotide Mismatch energies.**

Approaching non-complementary nucleotides will not in general assume geometries similar to those adopted by complementary nucleotides. The extent of relaxation may be considerable and makes it difficult to estimate mismatch energies in a consistent matter. To address this nucleotides were initially held in relative positions broadly comparable with those adopted by complementary nucleotides. While it is recognised that nucleotides will not adopt such positions it nevertheless yields a systematic and comparable measure of mismatch energies. Thus the N…N distance is set to 3 Å, and N-H…N bond angles held at 180º. Nucleotides were constrained to be planar and calculations were performed in the point group CS. Calculations were performed at the ab initio 6-31G* level of approximation. A fully comprehensive set of calculations between all nucleotides will be published later.

Calculations reported below show the mixed parity C:Χ association (one-mismatch) and same-parity (G:U) association (two mismatches) referred to in the text.

|  | Net binding energy of -38.3 kJ mol-1 |
| --- | --- |
|  | Repulsive energy of 111.9 kJ mol-1 |

**D/A Pattern 000**

D/A patterns 000 and 111 are not employed by nature. One of the more probable reasons is that the 000 pattern, three hydrogen acceptors, cannot be expressed using a N in the central position as this requires an isolated radical N (a). Expression using an oxygen in the central position is possible (b), but this yields an acid anhydride which is susceptible to hydrolysis. It seems that the 000 motif is not therefore accessible and therefore not viable as an information carrier.

| (a) | Radical N | (b) | Subject to hydrolysis |
| --- | --- | --- | --- |

**III - Demonstration that Nucleotides Formally Constitute a Parity Code.**

Nucleotides, numerically interpreted, form a code in terms of error-coding theory. We begin by considering the complete set of potential D/A patterns.

## Full Even-Parity Nucleotide Space

Let the set of 3-bit numbers, **W** = {000, 001, 010, 011, 100, 101, 110, 111} = **B**3, (the space of three-bit binary numbers) representing possible D/A patterns. These are of mixed parity. A parity code may be constricted by addition of a further bit set to 0 or 1 as required. This is achieved by a coding function.

The function maps the members of **W** to the set of 4-bit even-parity codewords, **C** = {0000, 0011, 0101, 0110, 1001, 1010, 1100, 1111}. **C** is the even-parity subset of **B**4 (the space of four-bit binary numbers). In brief, the three-bit numbers correspond to D/A patterns alone, while the four-bit numbers correspond to D/A patterns and the purine-pyrimidine nature together. The fourth and final bit reflecting the purine/pyrimidine nature of the codeword or nucleotide.

Formally, the D/A patterns are related to the Y/R size motif through a coding function, *f*: **B**3  **C**  **B**4. Using *w*i and *c*i to denote members of **W** and **C** respectively, the coding function may be expressed mathematically as

(1)

where the 3×4 matrix effects the coding function. This can now be exemplified in terms of the D/A patterns 100 and 011 used in the text.

# D/A Pattern 100 (Cytosine)

Thus the D/A pattern corresponding to 100 is mapped to (100,1)

(2)

D/A pattern 100 may only be expressed on a pyrimidine in an even-parity code = C.

# D/A Pattern 011 (Guanine)

(3)

D/A pattern 011 may only be expressed on a purine (in an even-parity code)– yielding G.

The first three columns in the matrix are the identity matrix, and thus the four-bit codewords and identical in the first three bits to the input three-bit word. The codeword differs from the input (3-bit) number by the addition of a bit. Such codes are termed systematic. The full potential code of 8 even-parity nucleotides may be described in error-coding terminology[[1]](#footnote-2) as **linear systematic (4,3) codes**; which means that 4 bits are employed to express the codewords, but that they convey only three bits of information.

The three information bits in the full potential alphabet derive from the different independent D/A patterns; log28 = 3. However, as nature uses just half of these the information content is just 2 bits/letter; log24 = 2. **This reduced code, the nucleotide alphabet, is therefore is a (4,2) code.**

1. J. G. Proakis, *Digital Communications* (McGraw-Hill, New York, 1995). [↑](#footnote-ref-2)
